# Supplementary material
Source: publisher figshare collection journal article supplement (https://sage.figshare.com/ndownloader/files/12784790)
Supplement: Supplementary file 1 [file 12784790]

**Supplementary Figure 1:** Effect of intervention on physical, cognitive, psychosocial and total fatigue.

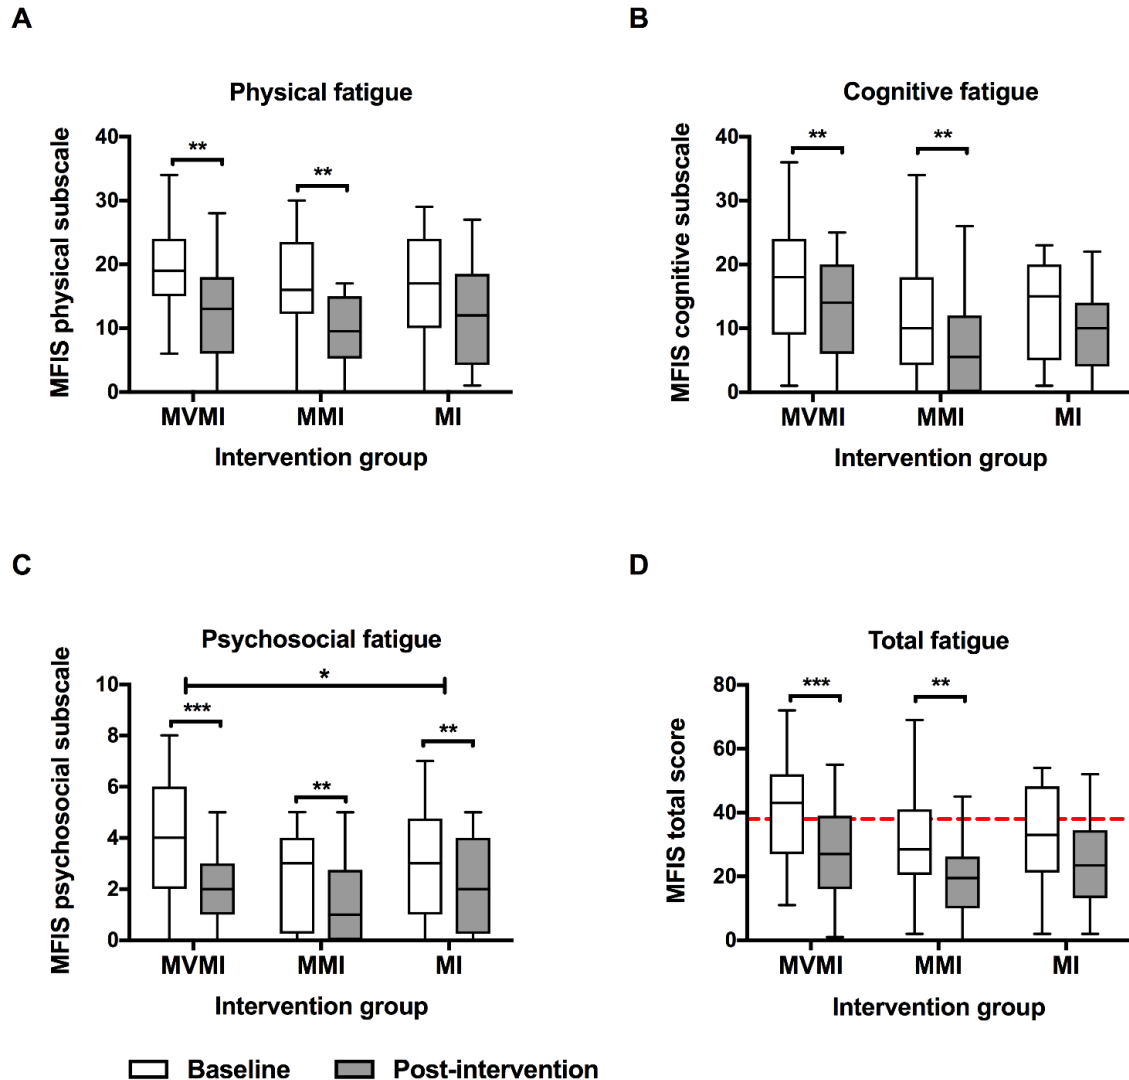

Figure legend: Abbreviations: MVMI: music- and verbally cued MI; MMI: music-cued MI; MI: motor imagery; MFIS: Modified Fatigue Impact Scale. (A) Physical, (B) cognitive, (C) psychosocial and (D) total fatigue; medians are shown by lines in the centre of the box-plots; the 25th-75th percentiles are indicated by the boxes and the range by the whiskers. Square brackets on top of the figures show significant within-group comparisons between baseline and post-intervention; **h-beams** indicate

significant group X time interactions. (D) The dashed line indicates the cut-off score for fatigue at 38 points on the total MFIS; \*p-value <0.05; \*\*p-value <0.01; \*\*\*p-value <0.001.
